# Supplementary material
Source: Springer Nature journal article supplement (https://www.springermedizin.de/resource/supplementary/13256_2011_2124_MOESM7_ESM.pdf/9649076)

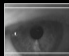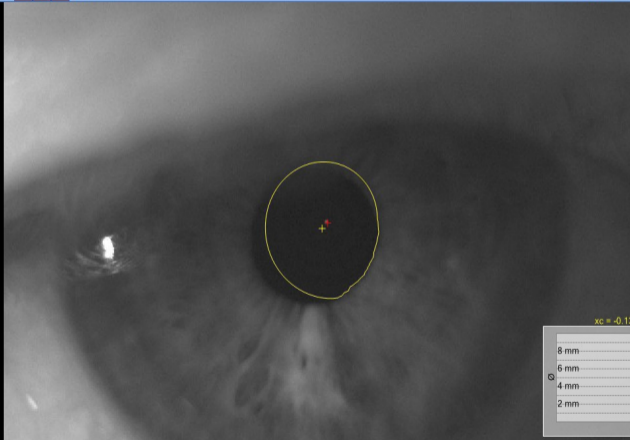

OD

 $xc = -0.13 \text{ mm}, yc = 0.11 \text{ mm}, \varnothing = 2.65 \text{ mm}$ 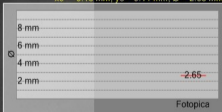

Supplement: MOESM7 [file 9649076]
